# Supplementary material
Source: PubMed Central journal article supplement (PMC3370894)
Supplement: f-68-00610-sup1.pdf [file f-68-00610-sup1.pdf]

Table S1 Thermodynamic parameters for wild type TAG toward 3-MeA interactions at pH7.8 and pH5.8 obtained by isothermal titration calorimetry

---

|                      | <b>pH7.8</b> | <b>pH5.8</b> |
|----------------------|--------------|--------------|
| N (stoichiometry)    | Fixed to 1   | Fixed to 1   |
| K ( $M^{-1}$ )       | 4550         | 2120         |
| $K_d$ ( $\mu M$ )    | 220          | 471          |
| $\Delta H$ (cal/mol) | -12300       | -6700        |
| $\Delta S$ (cal/mol) | -25.9        | -7.9         |

---
